# Supplementary material for: Total Electron Content PCA-NN Prediction Model for South-European Middle Latitudes
Source: MDPI journal article supplement (doi:10.3390/atmos14071058), 2023-06-21
Supplement: s1 [file s1]

# Supplementary Materials

for

## Total electron content PCA-NN model for middle latitudes

by

Anna Morozova <sup>1,2,\*</sup>, Teresa Barata <sup>1,3</sup>, Tatiana Barlyaeva <sup>1</sup> and Ricardo Gafeira <sup>1,2</sup>

This file contains Supplementary Materials (SM) referenced in the main text:

**Supplementary Table S1.** Absolute values of the correlation coefficients  $|r|$  between SWp. Only  $|r| \geq 0.68$  with p values  $< 0.01$  are shown. Correlation coefficients of SWp of the same type (IMF; solar wind; geomagnetic indices; solar UV and XR fluxes, and solar flares) have solid borders. Correlation coefficients between the coupling functions and other SWp have dashed borders.

|                      | By   | Bz | p    | Dst | ap | AE | Kp | Kcoi | F10.7 | XR   | C.f. |      |      |      |      |
|----------------------|------|----|------|-----|----|----|----|------|-------|------|------|------|------|------|------|
| Bx                   | 0.69 |    |      |     |    |    |    |      |       |      |      |      |      |      |      |
| n                    |      |    | 0.75 |     |    |    |    |      |       |      |      |      |      |      |      |
| ap                   |      |    |      |     |    |    |    |      | 0.74  |      | 0.85 | 0.89 | 0.86 |      |      |
| AE                   |      |    |      |     |    |    |    |      | 0.75  | 0.85 |      |      | 0.86 |      |      |
| Kp                   |      |    |      |     |    |    |    |      | 0.73  | 0.89 | 0.91 |      | 0.97 |      |      |
| Kcoi                 |      |    |      |     |    |    |    |      | 0.68  | 0.86 |      |      |      |      |      |
| dΦ <sub>MP</sub> /dt | 0.83 |    |      |     |    |    |    |      |       |      |      | 0.75 | 0.87 | 0.75 | 0.69 |
| E <sub>WAV</sub>     | 0.85 |    |      |     |    |    |    |      |       |      |      | 0.72 | 0.79 |      |      |
| E <sub>WV</sub>      | 0.82 |    |      |     |    |    |    |      |       |      |      | 0.78 | 0.80 | 0.7  |      |
| ε <sub>3</sub>       | 0.8  |    |      |     |    |    |    |      |       |      |      | 0.79 | 0.80 | 0.72 |      |
| E <sub>KLV</sub>     | 0.74 |    |      |     |    |    |    |      |       |      |      | 0.79 | 0.79 | 0.74 | 0.69 |
| E <sub>KL</sub>      | 0.77 |    |      |     |    |    |    |      |       |      |      | 0.72 | 0.77 | 0.69 |      |
| v·Bs                 | 0.85 |    |      |     |    |    |    |      |       |      |      | 0.7  | 0.76 |      |      |
| E <sub>SR</sub>      | 0.76 |    |      |     |    |    |    |      |       |      |      | 0.77 | 0.72 |      |      |
| E <sub>TL</sub>      | 0.75 |    |      |     |    |    |    |      |       |      |      | 0.73 | 0.68 |      |      |
| Mg II                |      |    |      |     |    |    |    |      |       | 0.79 | 0.82 |      |      |      |      |
| F10.7                |      |    |      |     |    |    |    |      |       |      | 0.84 |      |      |      |      |
| N.f.                 |      |    |      |     |    |    |    |      |       |      |      | 0.98 |      |      |      |
